# Supplementary material
Source: Research Square preprint supplement (doi:10.21203/rs.3.rs-10294520/v1)
Supplement: Supplementary file 1 [file 605e3ca851bbd157468e7991.docx]

**Supplemental Table 1. Sensitivity analyses for the association between SBP trajectory groups and poor 3-month functional outcome**

| **Analysis** | **Model** | **SBP trajectory group** | **OR (95% CI)** | **P value** | **P for trend** |
| --- | --- | --- | --- | --- | --- |
| **Primary analysis (Group 1 as reference)** | **Model 3 (fully adjusted)** | **Group 1 (Reference)** | 1 | - | 0.008 |
|  |  | **Group 2** | 1.12 (0.27-4.65) | 0.875 |  |
|  |  | **Group 3** | 2.89 (0.86-9.71) | 0.087 |  |
|  |  | **Group 4** | 5.12 (1.02-25.71) | 0.047 |  |
| **Sensitivity analysis (Group 2 as reference)** | **Model 1 (Age + Sex)** | **Group 2 (Reference)** | 1 | - | 0.005 |
|  |  | **Group 1** | 0.89 (0.21-3.70) | 0.875 |  |
|  |  | **Group 3** | 2.33 (1.09-4.98) | 0.029 |  |
|  |  | **Group 4** | 4.57 (1.51-13.82) | 0.007 |  |
|  | **Model 2 (+ Admission SBP + NIHSS + rtPA)** | **Group 2 (Reference)** | 1 | - | 0.006 |
|  |  | **Group 1** | 0.85 (0.20-3.59) | 0.819 |  |
|  |  | **Group 3** | 2.14 (0.98-4.67) | 0.056 |  |
|  |  | **Group 4** | 4.01 (1.26-12.77) | 0.019 |  |
|  | **Model 3 (fully adjusted)** | **Group 2 (Reference)** | 1 | - | 0.008 |
|  |  | **Group 1** | 0.89 (0.21-3.70) | 0.875 |  |
|  |  | **Group 3** | 2.00 (0.91-4.39) | 0.085 |  |
|  |  | **Group 4** | 3.66 (1.12-11.95) | 0.032 |  |

**Supplemental Table 2. Comparison of traditional logistic regression and LASSO penalized regression results for poor 3-month functional outcome (mRS 3-6)**

| **Variable** | **Traditional Logistic Regression (Model 3, Fully Adjusted)** | | | **LASSO Penalized Regression** | | |
| --- | --- | --- | --- | --- | --- | --- |
|  | **Coefficient** | **OR (95% CI)** | **P value** | **Shrunken Coefficient** | **OR (95% CI)** | **Variable Retained** |
| **SBP trajectory groups** | | |  |  |  |  |
| **Group 1 (Low-stable SBP, Reference)** | 0 | 1 | - | 0 | 1 | Yes |
| **Group 2 (Moderate-decreasing SBP)** | 0.11 | 1.12 (0.27-4.65) | 0.875 | 0.08 | 1.08 (0.29-4.02) | Yes |
| **Group 3 (Moderate-stable SBP)** | 1.06 | 2.89 (0.86-9.71) | 0.087 | 0.92 | 2.51 (0.93-6.77) | Yes |
| **Group 4 (High-elevated SBP)** | 1.63 | 5.12 (1.02-25.71) | 0.047 | 1.47 | 4.35 (1.15-16.47) | Yes |
| **Covariates** | |  |  |  |  |  |
| **Age (per 10 years)** | 0.22 | 1.25 (0.94-1.66) | 0.123 | 0.18 | 1.20 (0.97-1.48) | Yes |
| **Male sex** | -0.09 | 0.91 (0.52-1.59) | 0.735 | 0 | - | No |
| **Admission SBP (per 10 mmHg)** | 0.1 | 1.10 (0.96-1.26) | 0.162 | 0 | - | No |
| **Admission NIHSS (per 5 points)** | 0.35 | 1.42 (1.09-1.85) | 0.009 | 0.32 | 1.38 (1.12-1.70) | Yes |
| **Intravenous rtPA administration** | -0.27 | 0.76 (0.40-1.45) | 0.408 | 0 | - | No |
| **ASPECTS score (per 1 point)** | -0.2 | 0.82 (0.68-0.99) | 0.038 | -0.17 | 0.84 (0.72-0.98) | Yes |
| **Good collateral status (ASITN/SIR ≥3)** | -0.58 | 0.56 (0.32-0.98) | 0.042 | -0.52 | 0.59 (0.37-0.94) | Yes |
| **Antithrombotic therapy after EVT** | 0.11 | 1.12 (0.63-1.99) | 0.701 | 0 | - | No |
| **Model performance** | |  |  |  |  |  |
| **C-index (95% CI)** | 0.81 (0.74-0.88) | |  | 0.80 (0.73-0.87) | |  |
| **Akaike Information Criterion (AIC)** | 212.7 |  |  | 209.3 |  |  |

**Supplemental Table 3a**. Model Selection Results

| Number of groups | Polynomial order | BIC |
| --- | --- | --- |
| 1 | 3 | -22014 |
| 2 | 3 3 | -21304 |
| 3 | 3 3 3 | -21078 |
| 4 | 3 3 3 3 | -21019 |
| 5 | 3 3 3 3 3 | -21028 |
| 4 | 5 3 5 2 | -20961 |

BIC values are from the TRAJ procedure in SAS 9.4; lower values indicate better model fit

**Supplemental Table 3b**. Average posterior probabilities of final Selected 4 Trajectory Groups

| Group 1 | Group 2 | Group 3 | Group 4 |
| --- | --- | --- | --- |
| 0.85 | 0.88 | 0.86 | 0.86 |

**Supplemental Table 4.** Distribution of conventional blood pressure metrics across SBP trajectory groups (calculated from 212 patients' raw 24-hour SBP data)

| **Conventional BP metric** | **OR (95% CI)** | **Adjusted P value** | **C-index (95% CI)** |
| --- | --- | --- | --- |
| **Mean 24-hour SBP (per 10 mmHg)** | **1.21 (0.98-1.49)** | **0.07** | **0.71 (0.63-0.79)** |
| **Maximum 24-hour SBP (per 10 mmHg)** | **1.17 (0.97-1.41)** | **0.102** | **0.73 (0.65-0.81)** |
| **SBP SD (per 5 mmHg)** | **1.08 (0.85-1.37)** | **0.521** | **0.68 (0.60-0.76)** |
| **SBP CV (per 5%)** | **1.02 (0.73-1.42)** | **0.908** | **0.66 (0.58-0.74)** |
| **SBP trajectory groups** | **-** | **0.008** | **0.78 (0.73-0.87)** |

**Adjusted age, sex, admission SBP, admission NIHSS, tPA administered, admission ASPECTS and collateral status**
